# Supplementary material for: Peptide-Functionalized Silk Fibers as a Platform to Stabilize Gelatin for Use in Ingestible Devices
Source: MDPI journal article supplement (doi:10.3390/molecules27144605), 2022-07-19
Supplement: s1 [file s1]

## Supporting Information

# Peptide-Functionalized Silk Fibers as a Platform to Stabilize Gelatin for Use in Ingestible Devices

Luca Valentini <sup>1,\*</sup>, Lorenzo Pacini <sup>2</sup>, Fosca Errante <sup>3</sup>, Cecilia Morchio<sup>4</sup>, Beatrice Sanna<sup>4</sup>, Paolo Rovero <sup>3</sup>, and Antonino Morabito <sup>4</sup>

<sup>1</sup> Civil and Environmental Engineering Department, University of Perugia, Strada di Pentima 4, Terni, 05100, Italy; [luca.valentini@unipg.it](mailto:luca.valentini@unipg.it)

<sup>2</sup> Interdepartmental Research Unit of Peptide and Protein Chemistry and Biology, Department of Chemistry "Ugo Schiff", University of Florence, 59100 Sesto Fiorentino, Italy; [l.pacini@unifi.it](mailto:l.pacini@unifi.it)

<sup>3</sup> Interdepartmental Research Unit of Peptide and Protein Chemistry and Biology, Department of NeuroFarBa, University of Florence, 50019 Sesto Fiorentino, Italy; [fosca.errante@unifi.it](mailto:fosca.errante@unifi.it), [paolo.rovero@unifi.it](mailto:paolo.rovero@unifi.it)

<sup>4</sup> Dipartimento Neuroscienze, Psicologia, Area del Farmaco e della Salute del Bambino NEUROFARBA, Università degli Studi di Firenze, Viale Pieraccini 6, Firenze, 50121, Italy; [cecilia.morchio@unifi.it](mailto:cecilia.morchio@unifi.it), [beatrice.sanna@unifi.it](mailto:beatrice.sanna@unifi.it), [antonino.morabito@unifi.it](mailto:antonino.morabito@unifi.it)

\* Correspondence: [luca.valentini@unipg.it](mailto:luca.valentini@unipg.it)

## Supporting Information

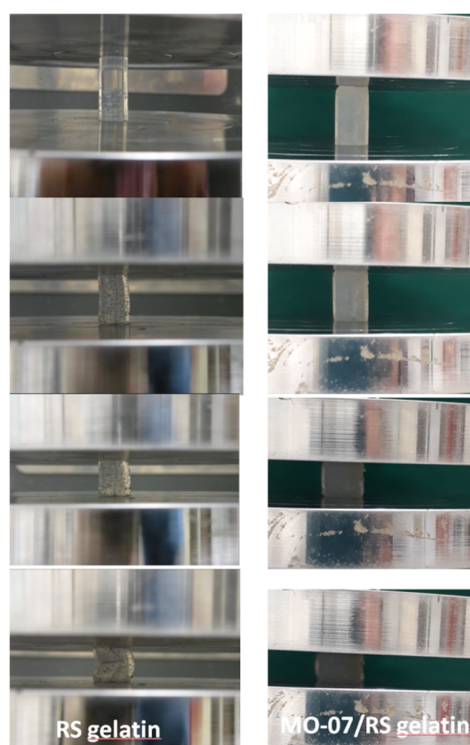

**Figure S1.** Photographs of the RS gelatin and MO-07/RS gelatin composite during the compression test.

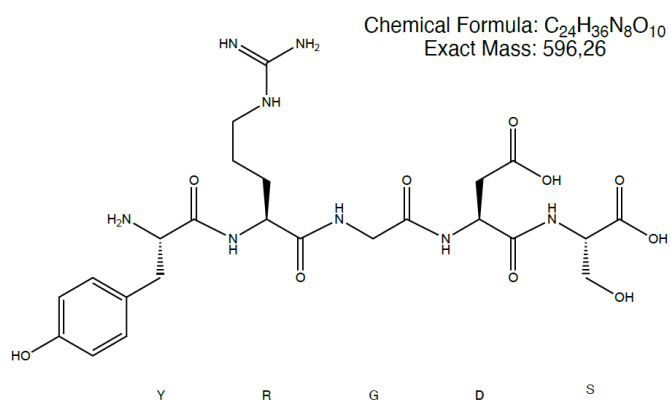

**Figure S2.** Sequence, chemical formula, and exact mass of peptide MO-07.

## Supporting Information

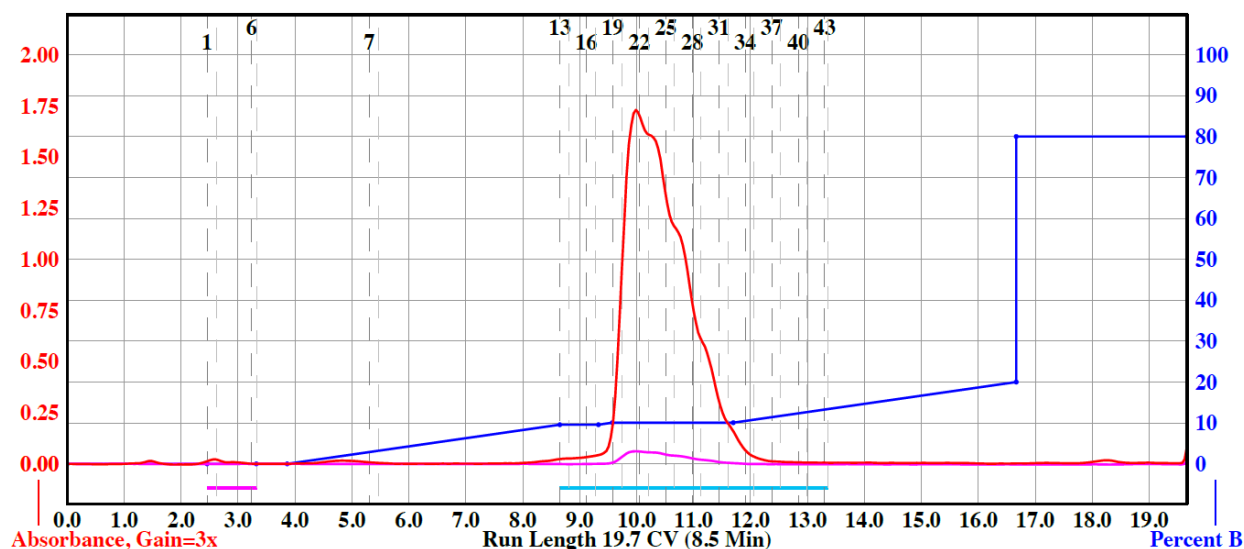

**Figure S3.** Chromatogram of MO-07 purification. Instrument used: CombiFlash® NextGen 300+ Teledyne ISCO. Column used: Teledyne ISCO RediSep® C18 Aq 15.5 g gold column. Eluents system: solvent A) 0.1% v/v TFA milliQ H<sub>2</sub>O, solvent B) 0.1% v/v TFA ACN. Gradient used: from 0% to 20% of B and lasts 10 CV.

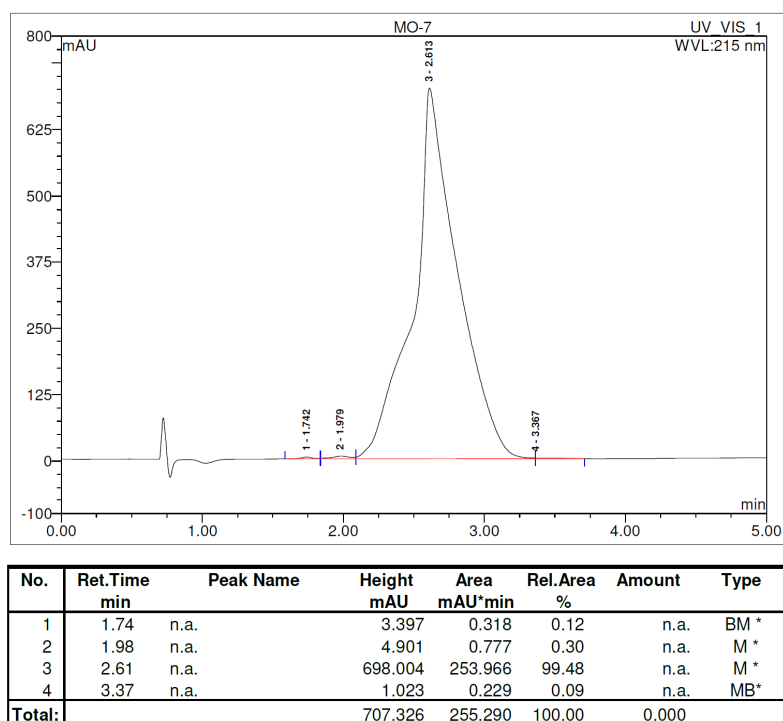

**Figure S4.** Chromatogram of MO-07 after purification. Instrument used: UHPLC Thermo Dionex Ultimate 3000. Column used: Acquity column UPLC CSH™ C18 (1.7  $\mu$ m, 2.1 x 100 mm). Eluents system: solvent A) 0.1% v/v TFA milliQ H<sub>2</sub>O, solvent B) 0.1% v/v TFA ACN. Gradient used: from 0.1% of ACN to 5% CAN in 5 minutes. Acquisition  $\lambda$ : 215 nm.

## Supporting Information

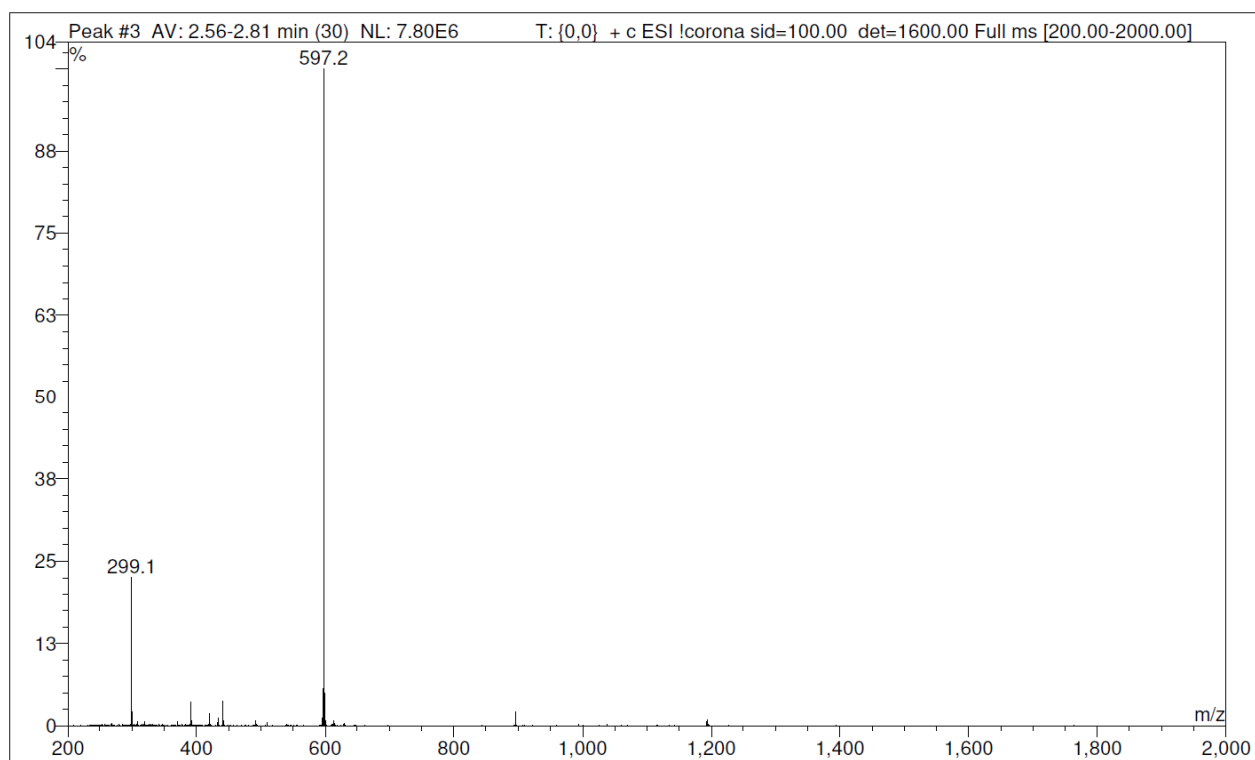

**Figure S5.** Mass spectrum of peptide MO-07 after purification. Instrument used: MSQ plus single quadrupole ESI mass spectrometer, Thermo Scientific.

## Supporting Information

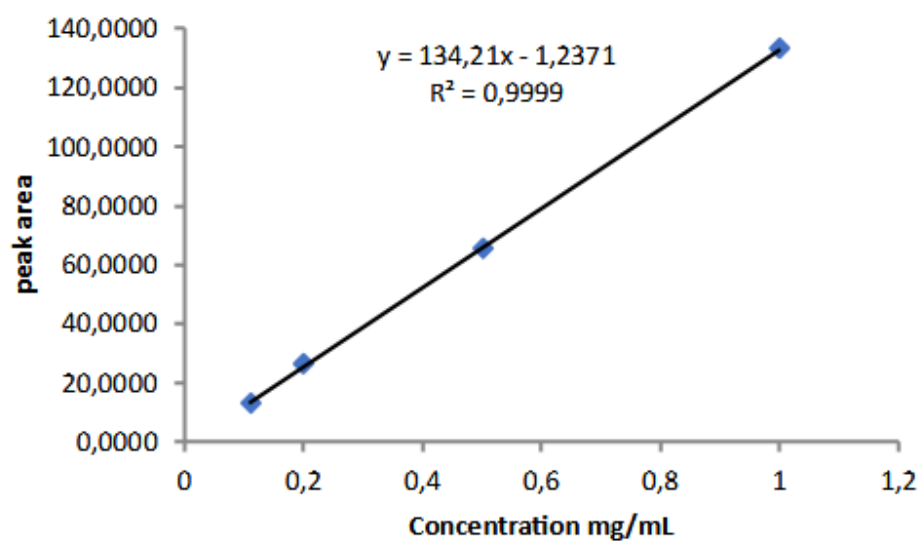

**Figure S6.** Calibration curve for peptide MO-07.

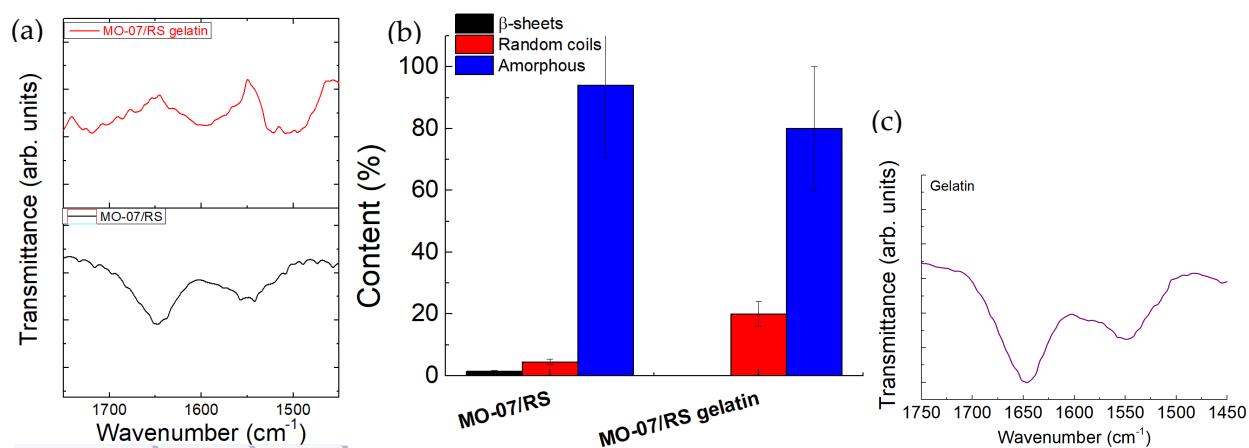

**Figure S7.** (a) FTIR spectra for MO-07/RS and MO-07/RS gelatin composite with (b) the structural conformation ratios derived from deconvoluted FTIR spectra. (c) FTIR spectrum of neat gelatin.
